# Supplementary material
Source: PubMed Central journal article supplement (PMC3820368)
Supplement: NIHMS518050-supplement-01.pdf [file NIHMS518050-supplement-01.pdf]

## SUPPLEMENTAL INFORMATION

*Deficiency of asparagine synthetase causes congenital microcephaly and a progressive form of encephalopathy.*

### Table of Contents

|                                                                                                                                                                                                               |           |
|---------------------------------------------------------------------------------------------------------------------------------------------------------------------------------------------------------------|-----------|
| <b>SUPPLEMENTAL DATA: FIGURES</b> .....                                                                                                                                                                       | <b>2</b>  |
| Figure S1. Brain MRIs from additional families. (Relates to Figure 2: MRI images from family C).....                                                                                                          | 2         |
| Figure S2. In vitro ASNS characterization. (Relates to Figure 3: Functional impact of ASNS mutations) .....                                                                                                   | 3         |
| Figure S3. ASNS expression in different tissues and the developing mouse brain. (Relates to Figure 5: Asns deficient mouse and structural brain abnormalities) .....                                          | 4         |
| Figure S4. Asns knock out mouse details and phenotyping. (Relates to Figure 5: Asns deficient mouse and structural brain abnormalities) ....                                                                  | 5         |
| Figure S5. Behavioral analyses of Asns mice. (Relates to Figure 5: Asns deficient mouse and structural brain abnormalities) .....                                                                             | 6         |
| <b>SUPPLEMENTAL DATA: TABLES</b> .....                                                                                                                                                                        | <b>7</b>  |
| Table S1. All rare variants shared in both patients from family B. (Relates to Table 2: Mutations identified in ASNS).....                                                                                    | 7         |
| Table S2. All rare homozygous functional variants found in both patients from family B. (Relates to Table 2: Mutations identified in ASNS)...                                                                 | 8         |
| Table S3. Regions of shared homozygosity in Family C. (Relates to Table 2: Mutations identified in ASNS).....                                                                                                 | 9         |
| Table S4. Exome sequencing variant filtering in family C. (Relates to Table 2: Mutations identified in ASNS).....                                                                                             | 9         |
| Table S5. Exome sequencing variant filtering in family D. (Relates to Table 2: Mutations identified in ASNS) .....                                                                                            | 10        |
| Table S6. F362V ASNS shared haplotype in families A and B. (Relates to Table 2: Mutations identified in ASNS).....                                                                                            | 10        |
| Table S7. Summary of exome-sequencing coverage in homozygous regions. (Relates to Table 2: Mutations identified in ASNS).....                                                                                 | 11        |
| Table S8. Seven primary microcephaly loci. (Relates to Table 2: Mutations identified in ASNS).....                                                                                                            | 11        |
| Table S9. Predicted homozygous regions overlapping known primary microcephaly loci. (Relates to Table 2: Mutations identified in ASNS) .....                                                                  | 12        |
| Table S10. Sequencing coverage for exome-sequenced samples from families A-D. (Relates to Table 2: Mutations identified in ASNS).....                                                                         | 12        |
| Table S11. Enzymes of the alanine, aspartate, and glutamine metabolic pathway and associated OMIM disorders. (Relates to Table 3: Measurements of amino acid concentrations in patient blood and urine) ..... | 13        |
| <b>SUPPLEMENTARY EXPERIMENTAL PROCEDURES</b> .....                                                                                                                                                            | <b>14</b> |
| <b>Comparison to MCPH genes</b> .....                                                                                                                                                                         | <b>14</b> |
| <b>PHENOTYPIC CHARACTERIZATION</b> .....                                                                                                                                                                      | <b>14</b> |
| Families A & B .....                                                                                                                                                                                          | 14        |
| Family C.....                                                                                                                                                                                                 | 14        |
| Family D .....                                                                                                                                                                                                | 15        |
| <b>Haplotype prediction</b> .....                                                                                                                                                                             | <b>16</b> |
| <b>Homozygosity mapping</b> .....                                                                                                                                                                             | <b>17</b> |
| <b>ASNS in population controls</b> .....                                                                                                                                                                      | <b>17</b> |
| <b>ASNS conservation and mutation locations in the folded ortholog</b> .....                                                                                                                                  | <b>17</b> |
| <b>Mouse behavioral testing</b> .....                                                                                                                                                                         | <b>18</b> |
| Mouse behavioral testing: overview.....                                                                                                                                                                       | 18        |
| Mouse behavioral testing: methods .....                                                                                                                                                                       | 18        |
| Mouse behavioral testing: additional results .....                                                                                                                                                            | 18        |
| <b>SUPPLEMENTAL REFERENCES</b> .....                                                                                                                                                                          | <b>20</b> |

## SUPPLEMENTAL INFORMATION

Deficiency of asparagine synthetase causes congenital microcephaly and a progressive form of encephalopathy.

### SUPPLEMENTAL DATA: FIGURES

**Figure S1. Brain MRIs from additional families. (Relates to Figure 2: MRI images from family C)**

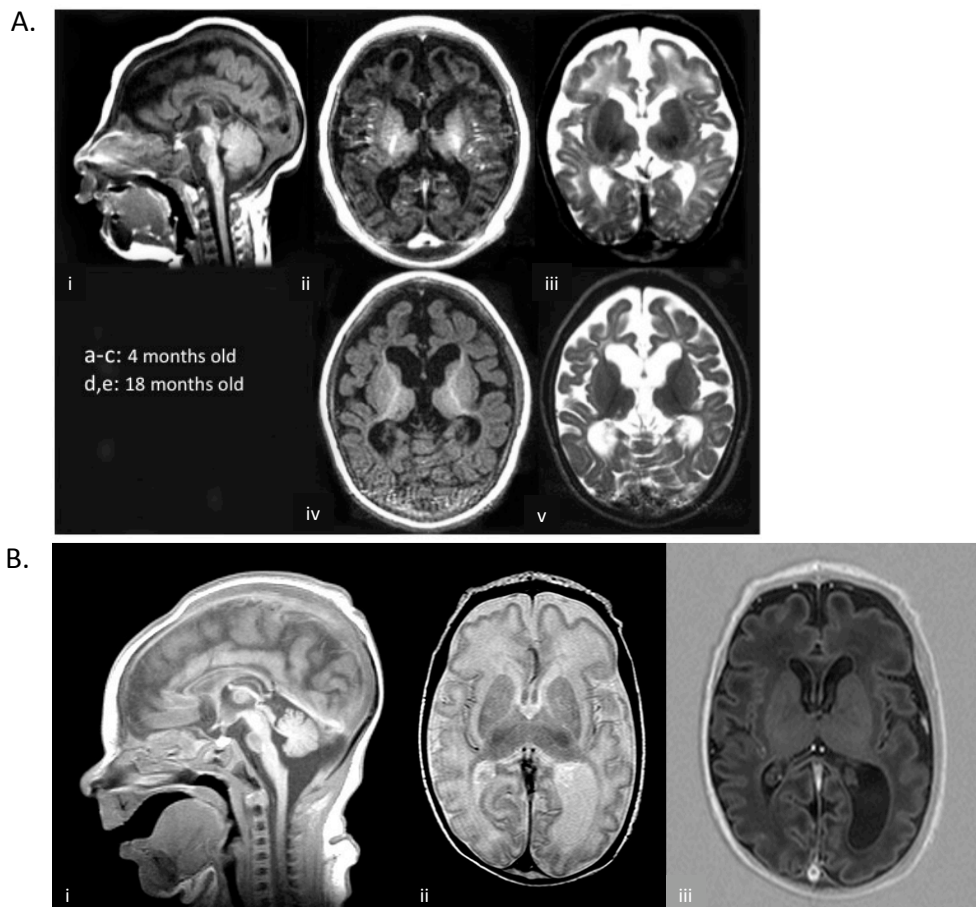

**Figure S1A. Brain MRI from patient A.II.1.** MRI from individual A.II.1 in family A. T1W sagittal image (i) at 4 months of age demonstrates micrognathia, sloping forehead, thin brainstem and relatively normal cerebellum. T1 axial image (ii) reveals severe cortical and subcortical atrophy and delay in myelin maturation, with myelin only in the posterior limbs of internal capsule. T2 axial image (iii) reveals abnormally increased signal intensity of the white matter for age, prominent ventricles and pericerebral spaces over the frontal convexity. T1W axial image (iv) at 18 months of age confirms persistent myelin delay and parenchymal volume loss. Concurrent T2W axial image (v) shows abnormal signal and atrophy of the white matter, progressive ventriculomegaly and pericerebral spaces due to volume loss. **Figure S1B. Brain MRI from patient D.II.2.** (i) Sagittal T1 image showing small pons. (ii) Axial T2 image showing decreased brain volume, delayed myelin maturation, and simplified gyral pattern predominantly in the frontal regions. (iii) Axial T1 image confirming the delayed myelination and the other findings seen on the Axial T2 image.

## SUPPLEMENTAL INFORMATION

Deficiency of asparagine synthetase causes congenital microcephaly and a progressive form of encephalopathy.

**Figure S2. In vitro ASNS characterization. (Relates to Figure 3: Functional impact of ASNS mutations)**

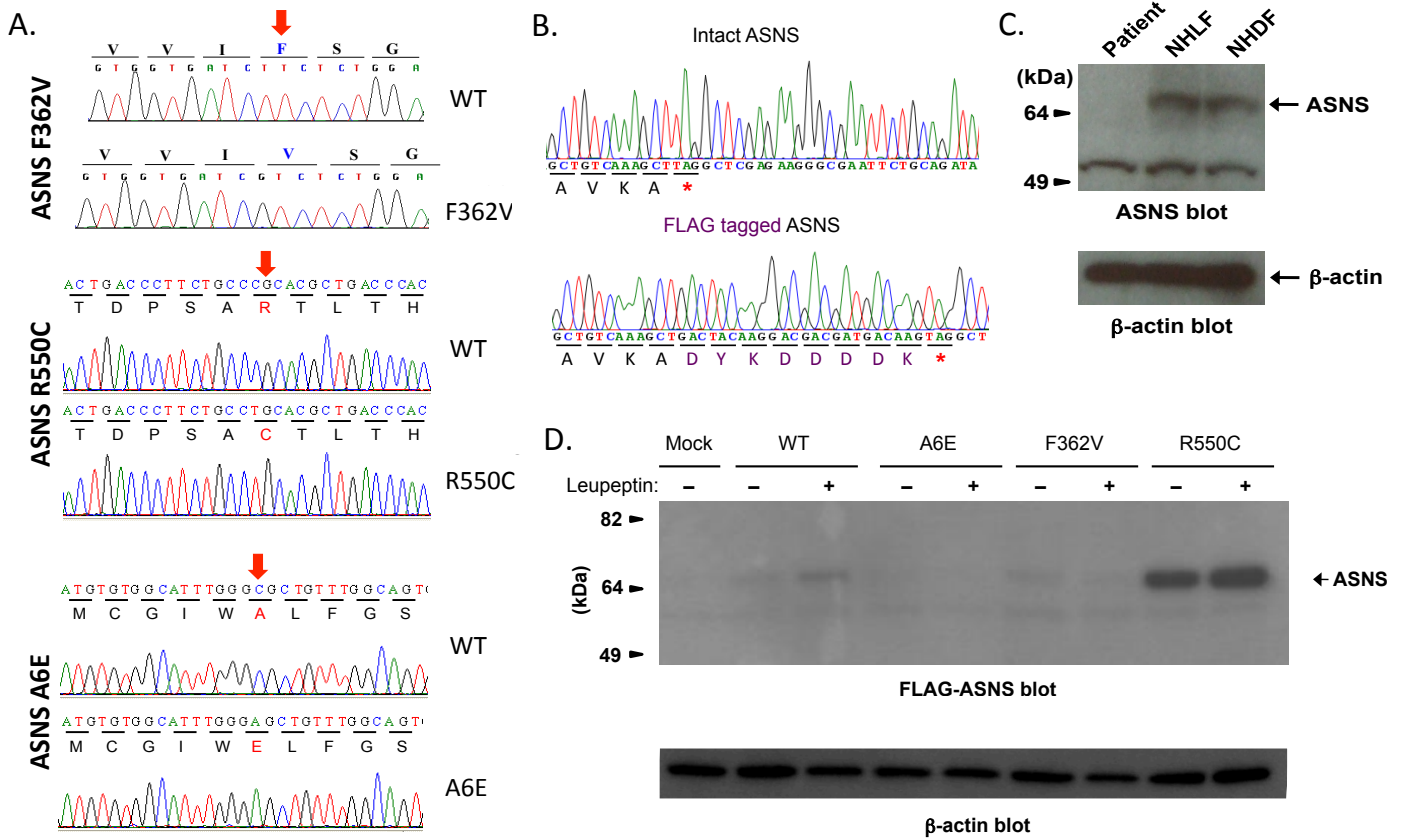

**Figure S2A. Sanger sequencing of *in vitro* ASNS alleles.** After PCR-directed mutagenesis, cDNA encoding human ASNS containing wild type or mutant alleles was subcloned into pcDNA3.1(+) vector and subjected to sequence analysis. **Figure S2B. Sanger sequencing of FLAG-tagged ASNS.** A FLAG-tag was introduced into the sequence encoding the C-terminus of ASNS for the wild type and the three mutant forms (A6E, R550C and F362V) and subjected to sequence analysis. **Figure S2C. ASNS levels in patient fibroblast cells.** ASNS in a patient with the F362V mutation (Family A: II.1) was detected using an anti-ASNS antibody. NHLF and NHDF are human fibroblast cell lines. The protein in the patient cells is depleted as was seen with the *in vitro* mutagenesis studies. **Figure S2D. ASNS levels in COS-7 cells transfected with empty, wild-type, or mutant vectors.** Western Blots detecting ASNS-FLAG protein abundance, with or without Leupeptin treatment, in COS-7 transfectants using an anti-FLAG antibody. β-actin was used as a loading control.

## SUPPLEMENTAL INFORMATION

Deficiency of asparagine synthetase causes congenital microcephaly and a progressive form of encephalopathy.

**Figure S3. ASNS expression in different tissues and the developing mouse brain. (Relates to Figure 5: Asns deficient mouse and structural brain abnormalities)**

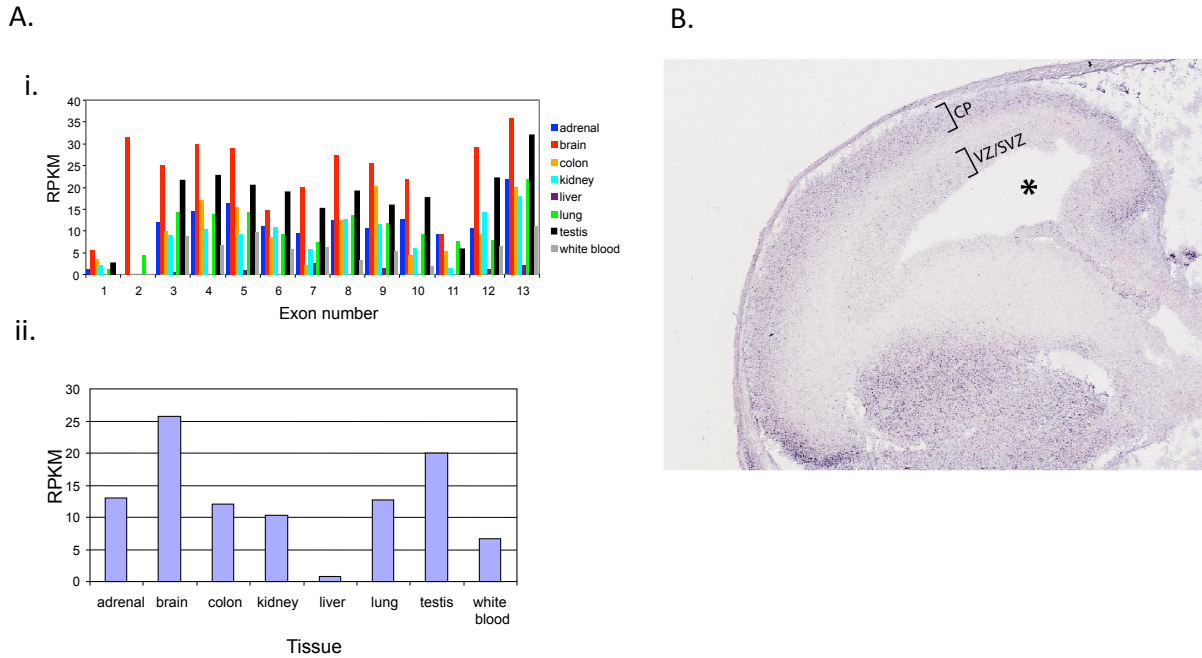

**Figure S3A. ASNS expression in different tissues.** Expression profile of ASNS gene (ENST00000394308) using RNA-seq data, extracted from the Human Body Map 2.0 Project of Illumina (downloadable from Integrative Genomics Viewer (IGV) at <http://www.broadinstitute.org/igv/>). In this database, the RNA from each tissue was obtained from a single individual. Extracted reads were aligned to the human genome (hg19) using Bowtie(Langmead et al., 2009), and BEDTools(Quinlan and Hall, 2010) was applied for counting the number of reads per exon. Data were normalized to reads per kilobase of exon model per million mapped reads (RPKM) values. (i) Normalized expression per exon, showing an indication of brain-specific expression of exon 2. (ii) Normalized expression for the whole gene. The finding that ASNS is more highly expressed in brain and testis is in agreement with Horowitz *et al.*(Horowitz et al., 1968). **Figure S3B. Asns expression in the developing mouse brain.** Asns mRNA *in situ* hybridization of the developing mouse brain (sagittal section) at E14.5. Asns expression is particularly enriched in the cortical plate (CP) and ventricular and sub-ventricular zone layers (VZ/SVZ). The asterisk is labeling the ventricle of the developing mouse cerebral cortex. *In situ* images were taken from (<http://www.eurexpress.org/>, euxassay\_004453)<sup>22</sup>.

## SUPPLEMENTAL INFORMATION

Deficiency of asparagine synthetase causes congenital microcephaly and a progressive form of encephalopathy.

**Figure S4. *Asns* knock out mouse details and phenotyping. (Relates to Figure 5: *Asns* deficient mouse and structural brain abnormalities)**

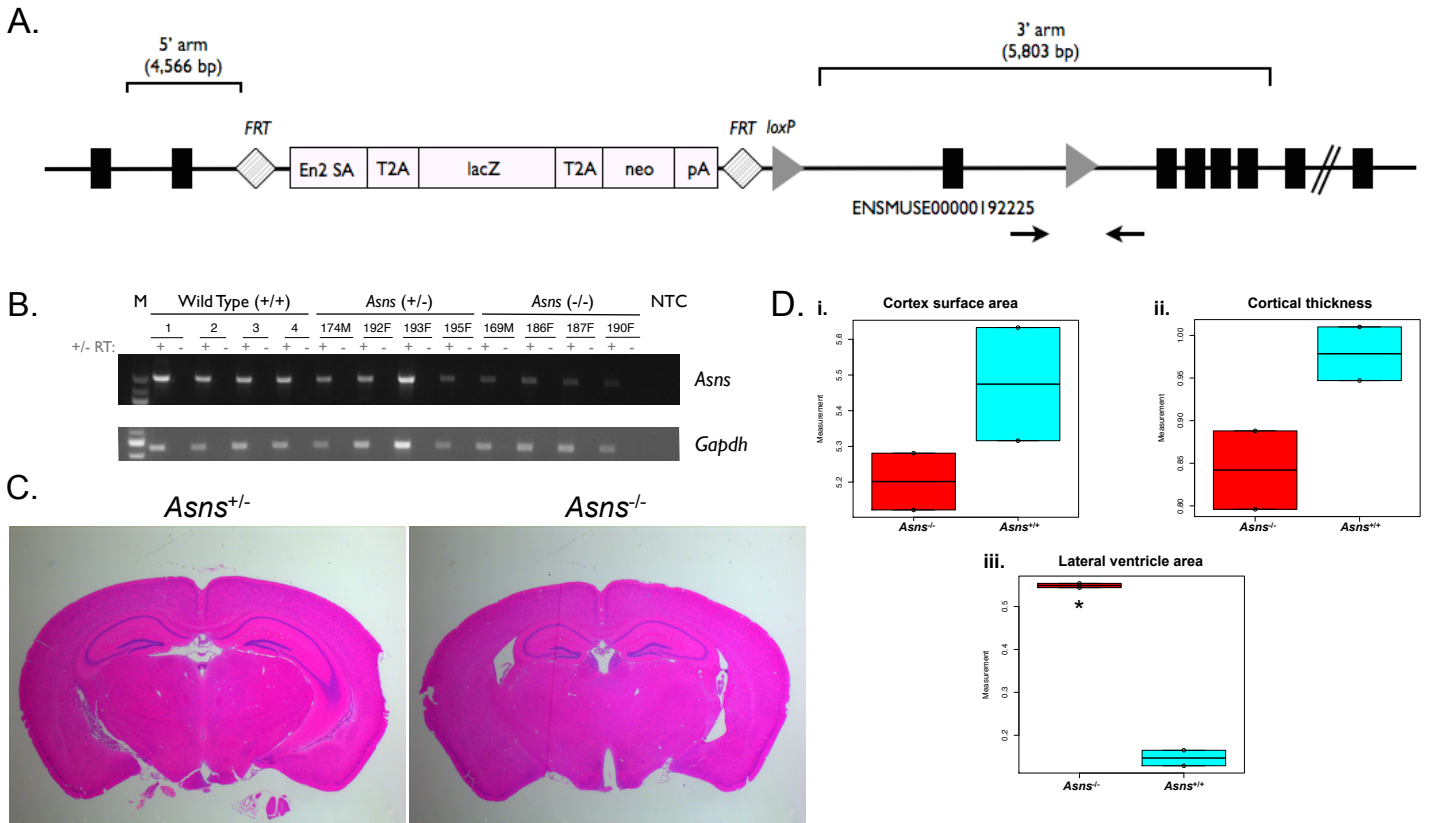

**Figure S4A. Construct for knocking out *Asns* and genotyping primers.** We obtained genetically modified mice from EMMA (<http://www.emmanet.org/strains.php>). This diagram shows the complete construct including the with a splice acceptor site, after exon 2, for the lacZ gene (B6NTac;B6N-*Asns*<sup>tm1a(EUCOMM)Wtsi/H</sup>). Mice were genotyped using the following custom primer sequences (black arrows): forward: 5'-TTT TGG TTT GTG TTT CTT CCT G-3' and reverse: 5'-TCA GGA ACG TGA GTG AGT GAG T-3'. **Figure S4B. *Asns* adult mouse brain RT-PCR exons 2-12.** *Asns* RT-PCR with low cDNA input (250ng) and PCR cycle (35 cycles) was used to assess the existence of *Asns* mRNA transcripts semi-quantitatively. RT-PCR spanned from exon 2 to exon 12 using the specific primer set: 5'- CAG TGT CTG AGT GCG ATG AAG A -3' and 5'- GCG TTC AAA GAT CTG ACG GTA G-3'. *Gapdh* RT-PCR with low cDNA input (250ng) and PCR cycle (25 cycles) was used as a control using the specific primer set: 5'- ACC ACA GTC CAT GCC ATC AC-3' and 5'-CAC CAC CCT GTT GCT GTA GCC-3'. **Figure S4C. *Asns* adult mouse brain sections.** Coronal sections from one homozygous mutant mouse (-/-) and an age matched (P84) heterozygous littermate (+/-). **Figure S4D. Postnatal day zero (P0) mouse brain measurements.** Measurements were taken using two homozygous mutant mouse and two age matched (P0) wild type littermates. (i) Surface area of the mouse cortex (right hemisphere only) (ii) cortical thickness and (iii) Lateral ventricle area of right hemisphere; \* indicates a significant difference by an unpaired t-test (p=0.019). Measurement units are arbitrary.

## SUPPLEMENTAL INFORMATION

Deficiency of asparagine synthetase causes congenital microcephaly and a progressive form of encephalopathy.

**Figure S5. Behavioral analyses of *Asns* mice. (Relates to Figure 5: *Asns* deficient mouse and structural brain abnormalities)**

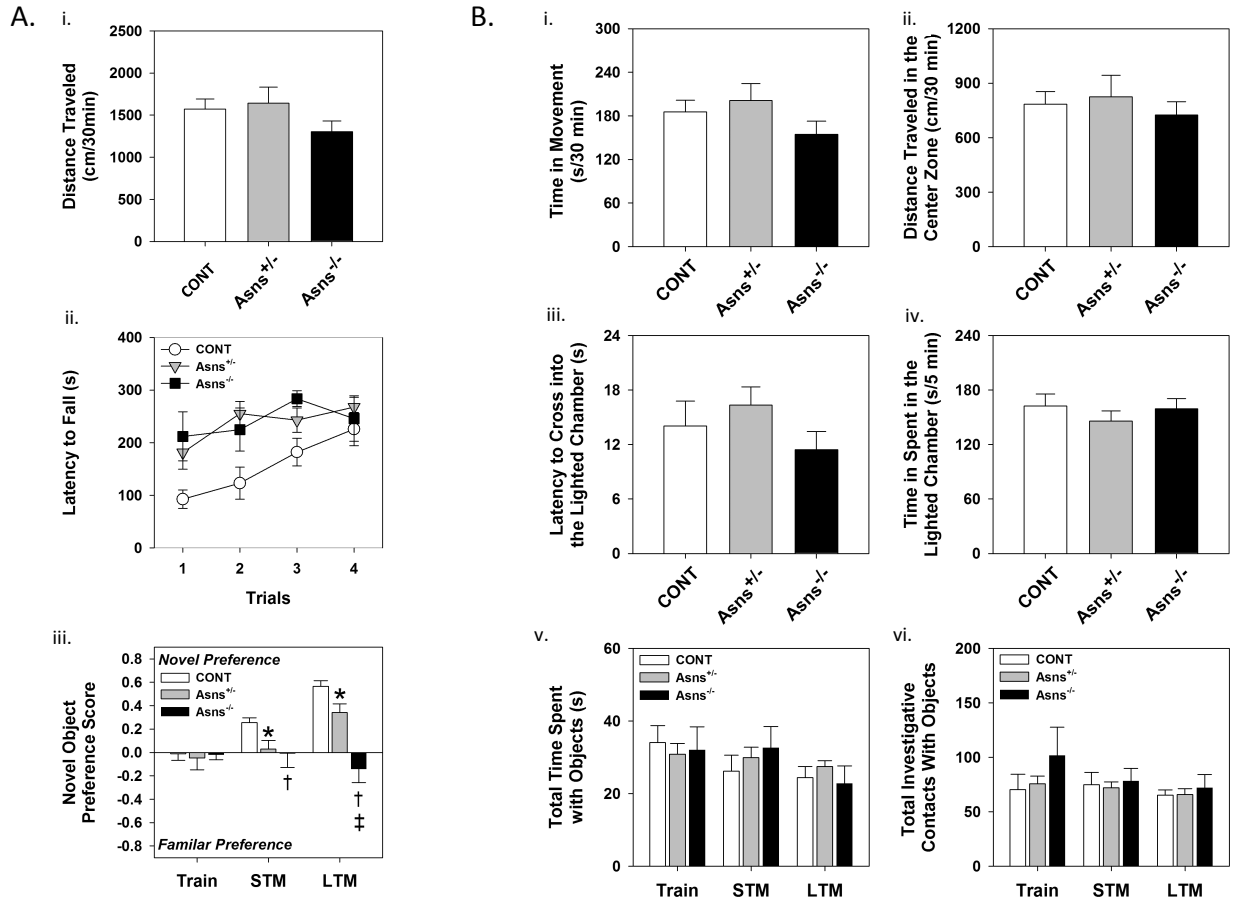

**Figure S5A. Behavioral analyses of *Asns* mice.** (i) Spontaneous locomotor activity in the open field over 30 min for B6NTac control (CONT), *Asns*<sup>+/-</sup>, and *Asns*<sup>-/-</sup> mice. (ii) Latency to fall from the rotorod across four trials. (iii) Preference scores from the novel object recognition test as assessments during training (Train), short-term (STM), and long-term memory. N=8 CONT, 11 *Asns*<sup>+/-</sup>, and 6 *Asns*<sup>-/-</sup> mice. \* $p < 0.05$ , CONT versus *Asns*<sup>+/-</sup> mice, † $p < 0.05$ , CONT versus *Asns*<sup>-/-</sup> mice, ‡ $p < 0.05$ , *Asns*<sup>+/-</sup> versus *Asns*<sup>-/-</sup> mice. **Figure S5B. Behavioral analysis of CONT, *Asns*<sup>+/-</sup>, and *Asns*<sup>-/-</sup> Mice.** (i) Time in movement in the open field. (ii) Distance traveled in the center zone of the open field. (iii) Latency to enter the lighted chamber in the light-dark emergence test. (iv) Time spent in the lighted chamber in the light-dark emergence test. (v) Total time spent with objects in the novel object recognition test. (vi) Total investigative contacts with objects. STM = short-term memory, LTM = long-term memory. N=8 CONT, 11 *Asns*<sup>+/-</sup>, and 6 *Asns*<sup>-/-</sup> mice.

## SUPPLEMENTAL INFORMATION

*Deficiency of asparagine synthetase causes congenital microcephaly and a progressive form of encephalopathy.*

### SUPPLEMENTAL DATA: TABLES

**Table S1. All rare variants shared in both patients from family B. (Relates to Table 2: Mutations identified in ASNS)**

| <b>Functional category</b>          | <b>Homozygous</b> | <b>Heterozygous</b> |
|-------------------------------------|-------------------|---------------------|
| Essential splice site               | 1                 | 2                   |
| Intron-exon boundary (SNV)          | 10                | 32                  |
| Intron-exon boundary (indel)        | 1                 | 9                   |
| Non-synonymous coding               | 58                | 248                 |
| Stop gained                         | 1                 | 5                   |
| Coding-disrupted frameshift (indel) | 1                 | 8                   |
| Coding-disrupted other (indel)      | 0                 | 2                   |
| <b>Total</b>                        | <b>72</b>         | <b>306</b>          |

**Table S1. All rare variants shared in both patients from family B.** A summary of all rare variants, with a plausible impact on the function of the resulting gene product, shared in family B (found in both affected individuals Fig. 1a: II.2 and II.4). A rare variant was defined as having a predicted homozygote frequency of  $\leq 3\%$  in the population of 261 sequenced control genomes.

**Table S2. All rare homozygous functional variants found in both patients from family B. (Relates to Table 2: Mutations identified in ASNS)**

| Variant   | Variant ID        | Variant type | Gene symbol | Variant frequency | Variant   | Variant ID    | Variant type | Gene symbol | Variant frequency |
|-----------|-------------------|--------------|-------------|-------------------|-----------|---------------|--------------|-------------|-------------------|
| 1         | 7_97322654_C      | SNV          | ASNS        | 0.000             | 37        | 9_39075808_C  | SNV          | CNTNAP3     | 0.117             |
| 2         | 7_107186210_T     | SNV          | CBLL1       | 0.000             | 38        | 19_38355194_C | SNV          | WDR88       | 0.119             |
| 3         | 7_107475774_C     | SNV          | LAMB4       | 0.000             | 39        | 19_59416242_A | SNV          | LILRB3      | 0.119             |
| 4         | 7_106296855_T     | SNV          | PIK3CG      | 0.002             | 40        | 22_44146055_T | SNV          | SMC1B       | 0.121             |
| 5         | 6_41721834_A      | SNV          | MDFI        | 0.004             | 41        | X_1497953_T   | SNV          | ASMTL       | 0.121             |
| 6         | 12_51248317_A     | SNV          | KRT74       | 0.006             | 42        | 12_48631243_A | SNV          | AQP2        | 0.123             |
| 7         | 7_106725874_C     | SNV          | COG5        | 0.008             | 43        | 16_2045401_T  | SNV          | TSC2        | 0.123             |
| 8         | 19_38307917_T     | SNV          | GPATCH1     | 0.010             | <b>44</b> | 15_19884068_C | SNV          | OR4N4       | 0.123             |
| 9         | 7_104993051_A     | SNV          | RINT1       | 0.012             | 45        | 6_32740678_A  | SNV          | HLA-DQB1    | 0.125             |
| 10        | 7_98997458_G      | SNV          | ZNF655      | 0.015             | 46        | 22_29862960_T | SNV          | PLA2G3      | 0.127             |
| 11        | 12_51152337_G     | SNV          | KRT6C       | 0.025             | 47        | X_1500706_G   | SNV          | ASMTL       | 0.127             |
| 12        | 17_35550980_DEL_T | indel        | CASC3       | 0.031             | 48        | 17_27649318_A | SNV          | RHBDL3      | 0.129             |
| 13        | 16_2100974_G      | SNV          | PKD1        | 0.044             | 49        | X_1506842_G   | SNV          | ASMTL       | 0.129             |
| 14        | 17_41416696_G     | SNV          | MAPT        | 0.046             | 50        | 11_77586662_A | SNV          | USP35       | 0.131             |
| 15        | 7_107004256_A     | SNV          | DUS4L       | 0.048             | 51        | 22_30919090_T | SNV          | RFPL2       | 0.131             |
| <b>16</b> | 6_24511434_T      | SNV          | MRS2L       | 0.050             | <b>52</b> | 19_59416243_A | SNV          | LILRB3      | 0.135             |
| 17        | 18_12244956_A     | SNV          | CIDEA       | 0.054             | 53        | 16_2105631_C  | SNV          | PKD1        | 0.137             |
| 18        | 7_102361951_G     | SNV          | LRRC17      | 0.054             | 54        | 20_10551750_A | SNV          | C20orf94    | 0.138             |
| 19        | 12_51838742_G     | SNV          | CSAD        | 0.056             | 55        | 3_41852418_C  | SNV          | ULK4        | 0.142             |
| 20        | 7_102452856_G     | SNV          | FBXL13      | 0.056             | 56        | 14_20569961_T | SNV          | TPPP2       | 0.146             |
| 21        | 19_38209355_T     | SNV          | RHPN2       | 0.060             | 57        | 1_151037145_A | SNV          | LCE1D       | 0.148             |
| 22        | 7_101885015_A     | SNV          | ALKBH4      | 0.062             | <b>58</b> | 12_51503256_A | SNV          | KRT79       | 0.148             |
| 23        | 19_13901896_A     | SNV          | CC2D1A      | 0.079             | 59        | 1_37961428_A  | SNV          | EPHA10      | 0.160             |
| 24        | 16_2102362_G      | SNV          | PKD1        | 0.083             | 60        | 10_18868641_G | SNV          | CACNB2      | 0.160             |
| 25        | 16_2095427_C      | SNV          | PKD1        | 0.087             | <b>61</b> | 7_29127129_T  | SNV          | CPVL        | 0.162             |
| 26        | 7_99655521_T      | SNV          | PVRIG       | 0.102             | 62        | 19_37859295_T | SNV          | RGS9BP      | 0.162             |
| 27        | 1_37958776_T      | SNV          | EPHA10      | 0.104             | 63        | 15_41604696_A | SNV          | MAP1A       | 0.163             |
| 28        | 7_100324690_C     | SNV          | UFSP1       | 0.104             | 64        | 16_2092388_G  | SNV          | PKD1        | 0.165             |
| 29        | 8_17202048_G      | SNV          | MTMR7       | 0.104             | 65        | 6_31432179_C  | SNV          | HLA-B       | 0.169             |
| <b>30</b> | 18_59805277_G     | SNV          | SERPINB8    | 0.104             | <b>66</b> | 15_19884261_G | SNV          | OR4N4       | 0.169             |
| 31        | 3_62164229_A      | SNV          | PTPRG       | 0.108             | 67        | 1_75475262_A  | SNV          | SLC44A5     | 0.171             |
| 32        | 1_159963696_C     | SNV          | FCRLB       | 0.110             | 68        | 2_111315429_T | SNV          | ACOXL       | 0.171             |
| 33        | 6_109430212_T     | SNV          | SESN1       | 0.110             | 69        | 11_77598578_G | SNV          | USP35       | 0.173             |
| 34        | X_152517671_INS_C | indel        | FAM58A      | 0.112             | 70        | 3_47427122_A  | SNV          | PTPN23      | 0.175             |
| <b>35</b> | 12_51330534_T     | SNV          | KRT2        | 0.115             | 71        | 2_238675316_C | SNV          | ESPNL       | 0.179             |
| 36        | 6_109587255_C     | SNV          | C6orf182    | 0.117             | 72        | 17_35133114_G | SNV          | ERBB2       | 0.179             |

**Table S2. All rare homozygous functional variants found in both patients from family B.** The 72 homozygous functional variants found in both II.2 and II.4 of family B. The variants are listed in ascending order based on the variant allele frequency in the sequenced control population. The bolded variant numbers denote the 9 variants that were also observed in the affected individual from family A (Fig. 1a, II.1).



## SUPPLEMENTARY INFORMATION

*Deficiency of asparagine synthetase causes congenital microcephaly and a progressive form of encephalopathy.*

**Table S3. Regions of shared homozygosity in Family C. (Relates to Table 2: Mutations identified in ASNS)**

| Chr | Marker start | Marker end | Position start | Position end | Size (Mb) |
|-----|--------------|------------|----------------|--------------|-----------|
| 1   | rs3863722    | rs272822   | 35,592,376     | 36,677,585   | 1.1       |
| 1   | rs319950     | rs9436447  | 49,091,687     | 50,590,732   | 1.5       |
| 3   | rs3895736    | rs3197999  | 48,658,467     | 49,721,532   | 1.1       |
| 3   | rs9790150    | rs2882429  | 133,723,028    | 139,835,865  | 6.1       |
| 4   | rs10517277   | rs6858830  | 33,466,803     | 34,500,856   | 1.0       |
| 5   | rs10477652   | rs10478752 | 123,179,118    | 126,087,378  | 2.9       |
| 7   | rs11773446   | rs7780168  | 95,944,485     | 131,291,677  | 35.3      |
| 12  | rs1564121    | rs12311684 | 86,138,548     | 89,435,177   | 3.3       |

**Table S3.** Regions of shared homozygosity (>1Mb) between the affected individuals in Family C (II.3 and II.4).

**Table S4. Exome sequencing variant filtering in family C. (Relates to Table 2: Mutations identified in ASNS)**

| Filter                                               | Remaining variants                                                                 |
|------------------------------------------------------|------------------------------------------------------------------------------------|
| Coding /Splicing                                     | 20,439                                                                             |
| Remove synonymous (non-splicing)                     | 10,175                                                                             |
| Rare*                                                | 856                                                                                |
| Homozygous                                           | 25                                                                                 |
| In homozygous region                                 | 3                                                                                  |
| Segregating with the disease in the homozygous state | ASNS:NM_183356:exon14:c.C1648T:p.R550C<br>CYP3A4:NM_017460:exon12:c.G1282A:p.D428N |
| Predicted damaging (SIFT or polyphen-2)              | ASNS:NM_183356:exon14:c.C1648T:p.R550C                                             |

**Table S4.** Exome sequencing variant filtering in family C. \*Rare variants were defined as those present at a frequency  $\leq 3\%$  in in-house control exomes (n=169), 1,000 genomes, and NHLBI Exome Sequencing Project.

## SUPPLEMENTAL INFORMATION

*Deficiency of asparagine synthetase causes congenital microcephaly and a progressive form of encephalopathy.*

**Table S5. Exome sequencing variant filtering in family D. (Relates to Table 2: Mutations identified in ASNS)**

|                                                                                                                            | Affected males                                       |        | Unaffected male | Unaffected female |
|----------------------------------------------------------------------------------------------------------------------------|------------------------------------------------------|--------|-----------------|-------------------|
|                                                                                                                            | II.1                                                 | II.2   | II.4            | II.5              |
| Coding/Splicing                                                                                                            | 20,336                                               | 21,120 | 19,325          | 20,252            |
| Remove synonymous (non-splicing)                                                                                           | 10,021                                               | 10,491 | 9,793           | 10,363            |
| Shared by II.1 and II.2                                                                                                    | 7,830                                                |        |                 |                   |
| Rare*                                                                                                                      | 237                                                  |        |                 |                   |
| Homozygous in II.1 & II.2 but <i>not</i> homozygous in II.4 or II.5                                                        | 0                                                    |        |                 |                   |
| Variants on chr X in II.1 and II.2 but not in II.4                                                                         | 0                                                    |        |                 |                   |
| Genes with ≥2 rare variants in common to II.1 & II.2                                                                       | 14                                                   |        |                 |                   |
| Genes with ≥2 rare variants in common to II.1 & II.2 but not in common with II.4 or II.5 ( <i>compound heterozygous</i> ). | ASNS (NM_183356)<br>c.C1648T:p.R550C<br>c.C17A:p.A6E |        |                 |                   |

**Table S5.** Exome sequencing variant filtering in family D. Rare variants were defined as those present at a frequency ≤3% in in-house control exomes (n=169), 1000 genomes, and NHLBI Exome Sequencing Project.

**Table S6. F362V ASNS shared haplotype in families A and B. (Relates to Table 2: Mutations identified in ASNS)**

| SNV | Coordinate    | Alleles |
|-----|---------------|---------|
| 1   | chr7:97322654 | C/C     |
| 2   | chr7:97325666 | A/A     |
| 3   | chr7:97326505 | T/T     |
| 4   | chr7:97621997 | C/C     |
| 5   | chr7:97654263 | T/T     |
| 6   | chr7:97660051 | A/A     |
| 7   | chr7:97660146 | A/A     |
| 8   | chr7:97760787 | T/T     |
| 9   | chr7:97760811 | A/A     |
| 10  | chr7:97771537 | T/T     |
| 11  | chr7:97782680 | A/A     |
| 12  | chr7:98298760 | A/A     |
| 13  | chr7:98338892 | T/T     |
| 14  | chr7:98396816 | C/C     |
| 15  | chr7:98487987 | C/C     |
| 16  | chr7:98488035 | C/C     |

**Table S6.** The shared F362V ASNS haplotype in families A and B. The 16 variants found in the shared p.F362V ASNS haplotype. The first SNV is the ASNS p.F362V variant.

## SUPPLEMENTAL INFORMATION

*Deficiency of asparagine synthetase causes congenital microcephaly and a progressive form of encephalopathy.*

**Table S7. Summary of exome-sequencing coverage in homozygous regions. (Relates to Table 2: Mutations identified in ASNS)**

| Individual      | # of genes with $\geq 70\%$ bases covered | # of genes with $< 70\%$ of bases covered | Average % of bases covered |
|-----------------|-------------------------------------------|-------------------------------------------|----------------------------|
| Family A (II-1) | 600                                       | 72                                        | 89.03%                     |
| Family B (II-2) | 601                                       | 71                                        | 89.01%                     |
| Family B (II-4) | 602                                       | 70                                        | 89.01%                     |

**Table S7.** Summary of exome-sequencing coverage in homozygous regions. There are 672 HGNC recognized protein-coding genes found either partially or fully within the predicted shared homozygous regions (n=170, present in all sequenced patients from Families A and B). All known Ensembl exons (Hubbard et al., 2009), excluding UTRs, were then assessed for coverage, where a base is considered covered if  $\geq 5$  short-reads spanned this nucleotide. Each sequenced sample has  $\geq 600$  of these genes with  $\geq 70\%$  of their bases covered and each sample averages nearly 90% nucleotide coverage across these 672 genes.

**Table S8. Seven primary microcephaly loci. (Relates to Table 2: Mutations identified in ASNS)**

| Locus | Location | Gene                                                    | Coordinates (NCBI36)         | MIM    |
|-------|----------|---------------------------------------------------------|------------------------------|--------|
| MCPH1 | 8p23     | Microcephalin (MCPH1)                                   | chr8:6,251,529-6,493,434     | 607117 |
| MCPH2 | 19q13    | WD repeat-containing protein 62 (WDR62)                 | chr19:41,237,623-41,245,393  | 613583 |
| MCPH3 | 9q33     | CDK5 regulatory subunit-associated protein 2 (CDK5RAP2) | chr9:122,190,968-122,250,225 | 608201 |
| MCPH4 | 15q21    | Centrosomal protein, 152-KD (CEP152)                    | chr15:37,900,001-42,700,000  | 613529 |
| MCPH5 | 1q31     | Abnormal spindle-like, microcephaly-associated (ASPM)   | chr1:195,319,997-195,382,287 | 605481 |
| MCPH6 | 13q12    | Centromeric protein J (CENPJ)                           | chr13:24,354,412-24,395,085  | 609279 |
| MCPH7 | 1p32     | SCL/TAL1-interrupting locus (STIL)                      | chr1:47,488,398-47,552,406   | 181590 |

**Table S8. Seven primary microcephaly loci.** The previously identified primary microcephaly loci and associated information about casual gene at each loci.

## SUPPLEMENTAL INFORMATION

*Deficiency of asparagine synthetase causes congenital microcephaly and a progressive form of encephalopathy.*

**Table S9. Predicted homozygous regions overlapping known primary microcephaly loci. (Relates to Table 2: Mutations identified in ASNS)**

| Individual      | Homozygous region start coordinate | Overlap gene | Overlap start coordinate | Overlap stop coordinate | Size of overlap (KB) |
|-----------------|------------------------------------|--------------|--------------------------|-------------------------|----------------------|
| Family A (II-1) | chr13:24181657                     | CENPJ        | 24354412                 | 24395085                | 40.674               |
| Family B (II-4) | chr8:6259807                       | MCPH1        | 6259807                  | 6364841                 | 105.035              |
| Family A (II-1) | chr8:6289591                       | MCPH1        | 6289591                  | 6466364                 | 176.774              |
| Family A (II-1) | chr9:122210554                     | CDK5RAP2     | 122210554                | 122250225               | 39.672               |

**Table S9. Predicted homozygous regions overlapping known primary microcephaly loci.** Four regions of homozygosity were identified by the PLINK program (Purcell et al., 2007) that overlap one of the known microcephaly loci. None of these regions were found in more than one of the three case genomes.

**Table S10. Sequencing coverage for exome-sequenced samples from families A-D. (Relates to Table 2: Mutations identified in ASNS)**

| Individual      | Total covered bases (MB) | % covered bases | Average read depth |
|-----------------|--------------------------|-----------------|--------------------|
| Family A (II-1) | 36.32                    | 96.1            | 79.92              |
| Family B (II-2) | 36.30                    | 96.0            | 63.93              |
| Family B (II-4) | 36.21                    | 95.8            | 69.59              |
| Family C (II-3) | 51.28                    | 95.0            | 80                 |
| Family D (II-1) | 51.64                    | 97.5            | 144                |
| Family D (II-2) | 51.37                    | 95.8            | 126                |
| Family D (II.4) | 51.53                    | 96.3            | 128                |
| Family D (II.5) | 51.67                    | 97.8            | 89                 |

**Table S10. Sequencing coverage for each of the exome-sequenced samples from families A-D.** A base within the 37.8Mb (families A and B) or the 52 Mb captured region (families C and D) is defined as covered if  $\geq 5$  short-reads spanned this nucleotide. After accounting for PCR duplicates and reads that did not align to captured regions of the reference genome, the average read depth for each sample was greater than 63x and greater than 95% of targeted bases were covered in all eight samples.

## SUPPLEMENTAL INFORMATION

*Deficiency of asparagine synthetase causes congenital microcephaly and a progressive form of encephalopathy.*

**Table S11. Enzymes of the alanine, aspartate, and glutamine metabolic pathway and associated OMIM disorders. (Relates to Table 3: Measurements of amino acid concentrations in patient blood and urine)**

| Enzyme   | Gene    | Associated OMIM disorder                          | OMIM disorder number | Neurological impairments |
|----------|---------|---------------------------------------------------|----------------------|--------------------------|
| 1.2.1.24 | ALDH5A1 | Succinic semialdehyde dehydrogenase deficiency    | #271980              | yes                      |
| 1.4.1.3  | GLUD1   | Hyperinsulinism-hyperammonemia syndrome           | #606762              | yes                      |
| 1.4.3.1  | DDO     | No disease associations in OMIM                   | -                    | no                       |
| 1.4.3.2  | IL4I1   | No disease associations in OMIM                   | -                    | no                       |
| 1.5.1.12 | ALDH4A1 | Hyperprolinemia, type II                          | #239510              | yes                      |
| 2.1.3.2  | CAD     | No disease associations in OMIM                   |                      | no                       |
| 2.4.2.14 | PPPAT   | No disease associations in OMIM                   | -                    | no                       |
| 2.6.1.1  | GOT1    | No proven disease associations in OMIM            | #614419              | no                       |
| 2.6.1.16 | GFPT1   | Myasthenia, congenital, with tubular aggregates 1 | #610542              | no                       |
| 2.6.1.19 | ABAT    | GABA-transaminase deficiency                      | #613163              | yes                      |
| 2.6.1.2  | GPT     | No disease associations in OMIM                   | -                    | no                       |
| 2.6.1.44 | AGXT    | Hyperoxaluria, primary, type 1                    | #259900              | no                       |
| 3.5.1.15 | ASPA    | Canavan disease                                   | #271900              | yes                      |
| 3.5.1.2  | GLS2    | No disease associations in OMIM                   | -                    | no                       |
| 3.5.1.3  | NIT2    | No disease associations in OMIM                   | -                    | no                       |
| 4.1.1.15 | GAD1    | Cerebral palsy, spastic quadriplegic, 1           | #603513              | yes                      |
| 4.3.2.1  | ASL     | Argininosuccinic aciduria                         | #207900              | yes                      |
| 4.3.2.2  | ADSL    | Adenylosuccinase deficiency                       | #103050              | yes                      |
| 6.3.1.2  | GLUL    | Glutamine deficiency, congenital                  | #610015              | yes                      |
| 6.3.4.16 | CPS1    | Carbamoylphosphate synthetase I deficiency        | #237300              | yes                      |
| 6.3.4.4  | ADSSL1  | No disease associations in OMIM                   | -                    | no                       |
| 6.3.4.5  | ASS1    | Citrullinemia                                     | #215700              | yes                      |
| 6.3.5.4  | ASNS    | No disease associations in OMIM                   |                      | yes                      |
| 6.3.5.5  | CAD     | No disease associations in OMIM                   | -                    | no                       |

**Table S11.** The identification of *ASNS* as the disease-causing gene in our patients also highlights the importance of human enzymes in the alanine, aspartate, and glutamine metabolic pathway in neurodevelopmental disorders. Human enzymes in the alanine, aspartate, and glutamine metabolic pathway ([http://www.genome.jp/kegg-bin/show\\_pathway?hsa00250](http://www.genome.jp/kegg-bin/show_pathway?hsa00250)) and their associated OMIM disorders.

## SUPPLEMENTAL INFORMATION

*Deficiency of asparagine synthetase causes congenital microcephaly and a progressive form of encephalopathy.*

### SUPPLEMENTARY EXPERIMENTAL PROCEDURES

#### **Comparison to MCPH genes**

Despite congenital microcephaly being a consistent feature of this syndrome, our patients do not fit the definition of primary microcephaly (MCPH). MCPH disorders are characterized by: a profoundly small head at birth, modest developmental delay (considering the dramatic microcephaly), mild or no seizures, and little or no deterioration. To date, there are seven distinct chromosomal loci for autosomal recessive primary microcephaly: MCPH1-MCPH7 (MIM 251200, 604317, 604804, 604321, 608716, 608393, and 612703, respectively). The causal genes have been identified for all of these loci (Table S8), including the recent discoveries of causal genes in MCPH2 (Bilguvar et al., 2010; Nicholas et al., 2010) and MCPH4 (Guernsey et al., 2010). Multiple types of casual mutations (e.g., non-synonymous, small deletions) have been identified in each of these genes (Bilguvar et al., 2010; Guernsey et al., 2010; Kaindl et al., 2010; Nicholas et al., 2010). The observed genetic heterogeneity is not surprising given the broad clinical spectrum of primary microcephaly (Cox et al., 2006).

However, since we still wanted to exclude the possible involvement of previously identified primary microcephaly genes (Table S8), these loci were analyzed with respect to the 1,532 homozygous regions identified in any of the three case genomes (families A and B). There were four homozygous regions that overlapped one of the microcephaly-associated genes, however these regions were never homozygous in more than one patient (Table S9). Parenthetically, exome sequencing has the potential to miss casual variants if the exon harboring it is not captured or if there is undetectable structural variation. Our analysis, however, suggests that homozygous variants on a single haplotype have not been missed in any of the microcephaly genes.

The new syndrome most resembles a host of neurometabolic disorders (Hart et al., 2007; Kelley et al., 2002; Siu et al., 2010) that show microcephaly at birth and progressive deterioration, including progressive brain atrophy. Amish microcephaly (MCPHA, OMIM #607196) is one of the most well-defined examples of a metabolic disorder which resembles the new syndrome. MCPHA is characterized by infantile microcephaly and  $\alpha$ -ketoglutaric aciduria. However, we noted that Amish microcephaly is more severe than the new syndrome in that Amish microcephaly is typically diagnosed at the second trimester (compared to the third trimester in our patients) and is associated with arrest of brain development *in utero* (Kelley et al., 2002; Siu et al., 2010).

### PHENOTYPIC CHARACTERIZATION

#### **Families A & B**

Patients were born at term with a small head circumference (at least two standard deviations below average). From early infancy they showed feeding difficulties, jitteriness, and increased disabling spastic tone, followed by evolution of intractable infantile spasms around the age of three months. The spasms were replaced by frequent myoclonic and tonic seizures, partially responsive to anticonvulsant therapy. By the age of one year, the children failed to reach significant milestones, showed spastic quadriplegia, profound ID, and cortical blindness and had a head circumference seven standard deviations below average. Physical examination was remarkable for mild dysmorphic features including receding forehead, big fleshy ears and relatively big hands and feet. Electroencephalogram (EEG) evolved from burst suppression pattern at three months to multiple independent spike foci (MISF) on a slow background. Visual and auditory evoked potentials (VEP, BERA), as well as electroretinogram (ERG), were normal. Brain CT at two months of age showed cortical atrophy without calcifications. Magnetic resonance imaging (MRI) at the age of three months showed diffuse cerebral atrophy, enlarged extra-ventricular spaces with normal size cerebellum and brainstem and at the age of 18 months, progressive cortical and subcortical atrophy with delayed myelination, moderately enlarged lateral ventricles and thin corpus callosum. The brain stem was small, while the cerebellum was only very mildly affected (Figure S1B (ii)). In each of the families one pregnancy was terminated due to arrest of head growth detected by a fetal ultrasound. In the aborted child from family A, a fetal brain MRI was also performed, which identified bilateral cortical dysplasia and cerebellar hypoplasia, both of which were confirmed by autopsy.

#### **Family C**

The patients were three siblings born to a consanguineous Bangladeshi couple in good health. An older sister is unaffected. The parents are second cousins in that the mother's maternal grandmother and the father's maternal grandmother were siblings.

**Patient C.II.1.** The couple's first child, a male, was born at term following an uncomplicated pregnancy. Delivery was by C-section due to thick meconium as well as fetal distress. His APGAR score were 5 and 8 at 1 and 5 minutes respectively, his birth weight was 3400 g (50<sup>th</sup> centile) and his head circumference (OFC) was 30.5 cm (-3.5SD). He was noted to be jittery during the first hour of life with episodes of hyperekplexia. He required oxygen at birth but quickly was weaned. EEG recording at 9 days of age was moderately abnormal due to disorganized and discontinuous background. No epileptiform discharges were seen. Initial MRI showed left transverse sinus

## SUPPLEMENTAL INFORMATION

*Deficiency of asparagine synthetase causes congenital microcephaly and a progressive form of encephalopathy.*

thrombosis and cerebral dysgenesis and renal ultrasound showed echogenic kidneys. He was treated with anticoagulants and a CT scan venography at 2 months of age showed that the thrombus cleared. He had no developmental milestones and showed feeding difficulties with episodes of aspirations for which a G-tube was inserted. Repeat brain MRI revealed an immature brain with delayed myelination as well as a left transverse sinus thrombosis. The infant continued having tremor, persistent hyperekplexia and was discharged from the hospital at a month of age only to be re-admitted at 3.5 months of age with respiratory failure. He was intubated and ventilated but multiple attempts at extubation over the course of 3.5 weeks failed due to central respiratory drive failure. Given the infant's futile outlook, the infant life support was withdrawn at 4 months of age. Investigation including chromosome analysis, metabolic work-up and studies for congenital infections showed no abnormalities. The family declined both autopsy and DNA banking.

The couple's second pregnancy resulted in a healthy daughter following an uneventful pregnancy and delivery. At 8 years of age she has no health or developmental issues.

**Patient C.II.3.** The couple's third pregnancy was followed closely and chorionic villi sampling (CVS) for maternal age revealed a normal male karyotype (46,XY). Serial ultrasounds at 19, 22, 26, and 32 weeks gestation all revealed normal head size at each gestational age. Delivery was by repeat caesarean section at 39 weeks gestation. Birthweight was 3520g (50<sup>th</sup> centile) and OFC was 33 cm (-1SD/-2SD). Shortly after birth he developed jittery seizure-like movements and hyperekplexia mirroring those of his late brother. Extensive investigation including plasma amino acids [asparagine value was 12 mmol/L after birth and 17 mmol/L at 2 months (normal 16-21 mmol/L), urinary organic acids, plasma very long chain fatty acids, 7 dehydrocholesterol, transferrin isoelectric focusing, free and total carnitine, serum ceruloplasmin, blood CK, urine mucopolysaccharides and urine oligosaccharides were normal. Chromosome microarray analysis was normal. Initial EEG demonstrated intermittent right and left frontal sharp waves occurring independently of uncertain significance, possibly indicative of underlying cerebral dysfunction. No definitive seizure activity was noted. A repeat EEG done at a month of age was contaminated by a large amount of movement artifact. Within these limitations, the waking background activity did not show any definite abnormality, nor did a brief period of active sleep. Although not definitely abnormal, there were very frequent interictal sharp waves recorded independently over both frontopolar regions with a definite left sided predominance. No ictal epileptiform discharges were recorded. A repeat EEG at 2 months of age was abnormal with discontinuous and asynchronous background and positive Rolandic sharp waves seen over the left more than right hemisphere. No electrographic seizures were seen. Basal auditory evoked potential was normal, visual evoked potential and electroretinogram showed delayed cortical response by 45 msec and somatosensory evoked potential of the median nerve showed absent cortical response bilaterally. EMG was normal. Brain MRIs revealed volume loss of cerebral hemispheres and pons, with normal appearing cerebellum, delayed myelination of posterior limbs of internal capsule and dorsal brainstem, with mild restricted diffusion of both thalami and possibly basal ganglia. There was mildly elevated lactate peak on MRS and no imaging evidence of prenatal asphyxia. The findings were similar to the MRI findings performed on his late brother. At 2 months of age he was noted to have right hemidiaphragm palsy and had increasing respiratory failure. He developed hypothermia and hypercapnia and was removed from respiratory support at 3 months of age.

**Patient C.II.4.** The couple's fourth pregnancy was again followed closely and CVS for maternal age revealed a normal male karyotype (46,XY). Fetal ultrasounds at 19, 28, and 30 weeks showed normal head growth. At 32 weeks a slight lag in OFC was noted, with progressive development of microcephaly seen at 32, 34 and 35 weeks gestation by ultrasound. The baby was born at 35.7 weeks gestation via repeat C-section. The APGAR scores were 9 and 9 at 1 and 5 minutes respectively. Birth weight was 3230 g (50<sup>th</sup> centile), birth length was 51.5 cm (50-97 centile) and OFC was 32 cm (-2SD). At 6 hours after birth, he was noted to have abnormal movements with jitteriness and hyperekplexia. He was initially intubated but extubated at 2 days of age and was noted to have stridor. He continued having seizure episodes with back arching and apnea and was treated with clonazepam and phenobarbital. EEG on his first day showed discontinuous background with longer interburst interval than appropriate for age with occasional positive and negative sharp waves over the left central and temporal head regions. There were occasional runs of theta and alpha rhythm of unknown significance. No seizures were captured during this recording. Brain MRI showed microcephaly, delayed myelination and under development of the brain with brainstem hypoplasia. The findings were similar to the MRIs done on the previous siblings. Plasma amino acids and urine organic acids were normal. The anticonvulsive treatment resulted in decrease in his jitteriness and he did not have respiratory problems apart from stridor, which was attributed to laryngomalacia. He was orally fed with frequent vomiting and continued having tremor and jitteriness although this decreased with time. He was transferred to a palliative care facility and died at 6 months of age.

### **Family D**

The patients were three brothers born to a nonconsanguineous French-Canadian couple in good health. An older sister is unaffected.

## SUPPLEMENTAL INFORMATION

*Deficiency of asparagine synthetase causes congenital microcephaly and a progressive form of encephalopathy.*

**Patient D.II.1.** The pregnancy and neonatal period were considered normal but on the first routine home visit by a nurse at 5 days of age, he was found to have irregular breathing, rectal temperature of 34.6° to have poor suction at feeds. He was examined in a local center and transferred to CHU Sainte-Justine where he was intubated and became respirator-dependent. He was microcephalic (31.5 cm; -2.5SD) with central hypotonia and increased tone in the legs and tremulous movements of the extremities. Visceral examination was normal. Glycemia, blood pH, transaminases, renal function were normal. Fasting plasma amino acids showed asparagine 11 µmol/L (normal range, 31 to 56). Urine organic acids and plasma very long chain fatty acids were interpreted as normal. Transferrin isofocalization was normal. MECP2 gene sequencing and deletion analysis were normal. Cerebral magnetic resonance imaging (MRI) showed microcephaly with reduced gyration. He was extubated and died rapidly thereafter of respiratory failure, aged 9 days. Neuropathological examination revealed microcephaly, although the gyral pattern was preserved grossly on external examination. There was cortical dysgenesis (nests of cells in the subpial region and multiple thin layers of nuclei in the cortex, thinner and more numerous than normal). Also present were absence of the bulbar arcuate nucleus, marked periventricular leukomalacia; and marked gliosis. The visceral examination was normal.

**Patient D.II.2.** The patient was born after a normal pregnancy at 39 5/7 weeks by spontaneous vaginal delivery. Fetal MRI at 31.5 weeks gestation and fetal ultrasound at 35 weeks, were normal. On neonatal examination, jerky and tremulous movements and limb hypertonia were noted. Body temperature was repeatedly normal. Head circumference was 31 cm (-3SD). At 4 days of age an EEG showed deficient electrical activity with bursts of activity with spike activity maximal in the right fronto-centro-temporal regions. Cerebral MRI at 4 days of age revealed a reduction of the normal gyral pattern. The opercularisation of the sylvian fissure corresponded to that of a 34 week old child (at a chronological age of 39 weeks). There was a diffuse hypointensity on T1 imaging, demonstrating a slowness of myelination. The parieto-occipital horns were prominent, especially on the left. The subarachnoid space was prominent. Plasma amino acids were normal including asparagine (55 µmol/L; normal, 31-56), as were urine organic acids, transferrin isofocusing, analysis of subtelomeres and ARX gene sequencing. Ophthalmologic consultation revealed cortical blindness. At age 9 months, partial motor convulsions were reported and focal epileptic activity was seen on EEG; control was achieved with carbamazepine. Examination at 10 months showed a nondysmorphic child with an absence of motor development and cranial circumference of 40 cm (<3%). He reacted to noise but showed no ocular pursuit. Divergent strabismus, axial hypotonia and limb hypertonia and hyperreflexia were present. The lower limbs were more severely affected than the upper. He died at age 11 months following an upper respiratory infection associated with respiratory acidosis (pCO<sub>2</sub>, 120; pH, 7.03) and hypothermia (30° C). At autopsy, neuropathology confirmed microcephaly with severe mesial temporal sclerosis and neuronal loss in regions CA3, CA4 and CA1, dysplasia of the olivary nucleus. The spinal cord showed hydromelia with secondary degeneration of motor neurons and reactive gliosis.

**Patient D.II.3.** The pregnancy was initially normal. Fetal ultrasound was normal at 25 weeks of gestation. Placental abruption with fetal distress occurred at 33 weeks, and emergency cesarean section was performed. Apgar scores were 4 at one minute, 7 at 5 minutes and 10 at 10 minutes. Birth weight was 2160 g (50-75%), length 46 cm (75%) and head circumference 30 cm (25<sup>th</sup> centile). Although the patient initially cried vigorously, he showed hypoventilation within hours of birth. Respiratory distress syndrome was diagnosed clinically and on thoracic radiographs. He was intubated. Because of apnea he was treated with caffeine on day two. After resolution of his pulmonary disease, attempts to wean him from continuous positive airway pressure failed because of the development of apnea, cyanosis and bradycardia. Tremulous movements of the extremities were noted. He was transferred to CHU Sainte-Justine on day 6. Convulsions were noted on day 8. He was extubated at 3 weeks of age. At that time he could ingest adequate amounts of formula orally. His head circumference at one month of age was 30.2 cm and at 10 months, 39.5 cm (<3%). His subsequent clinical course was similar to that of patient 2. His convulsions were controlled by small doses of Phenobarbital. He died at age 12 months of respiratory insufficiency secondary to a respiratory infection, associated with hypothermia.

### **Haplotype prediction**

To determine if the p.F362V *ASNS* variant is always found on the same haplotype, all high confidence SNVs (coverage ≥10, ≥5 reads supporting the variant, SNV quality ≥30, SNV consensus ≥30) on chromosome 7 were collected from each of the three exome-sequenced patients (Families A and B). Next, the regions on either side of the *ASNS* variant were examined to find the boundaries of the homozygous stretches containing the *ASNS* variant in each individual. Finally, the SNVs in this region were compared across samples to obtain the largest possible haplotype that was shared by all three affected patients. This estimated haplotype is approximately 1.2 Mb (build 36, Chr7: 97322654-98488035) and is tagged by 16 SNVs (Table S6).

These 16 SNVs were also assessed in the 261 sequenced controls. The genotype for each of these SNVs was input into the fastPHASE program<sup>22</sup> in order to infer the phase of these variants in each control sample. Only 17 controls had all 15 SNVs (the *ASNS* variant at the outer boundary was not found in any controls), and the majority of these variants were found in heterozygous form. Of the 522 possible haplotypes, fastPHASE determined that 2 haplotypes were identical to the *ASNS* haplotype (excluding the *ASNS* variant itself) when the individual haplotype error was minimized, and 4 haplotypes were identical to the *ASNS* haplotype (again, excluding the *ASNS* variant



## SUPPLEMENTAL INFORMATION

*Deficiency of asparagine synthetase causes congenital microcephaly and a progressive form of encephalopathy.*

itself) when switching error was minimized. All 4 of these control samples are self-identified as Caucasian.

### **Homozygosity mapping**

To identify all potentially overlapping homozygous stretches between the families A and B, we used the exome-sequence data to detect homozygous regions present in these three cases. The largest homozygous region seen in all three case genomes was ~3 Mb and included the *ASNS* gene. The average size of the remaining shared homozygous regions (n=169), found in these three case genomes, was 131.4 Kb. The sequenced patients from families A and B have an average of 90% of bases covered across the protein-coding portions of the genes in the shared homozygous regions (Table S5). This analysis increases our confidence that the *ASNS* variant is the causal variant associated with the observed phenotype.

We used all identified high-quality single nucleotide variants to perform homozygosity mapping. The SNVs in all three of the cases were analyzed using the PLINK "homozygosity mapping" tool (Purcell et al., 2007). This algorithm considers sliding windows across the genome and screens for homozygous variants in those regions. To account for the nonrandom spacing of SNVs in the exome data and to detect such regions with high sensitivity, very generous thresholds were applied as outlined below.

The default values provided by PLINK were designed for analysis from dense SNP maps. However, here we were analyzing the SNVs identified by exome-sequencing. Thus before proceeding, all SNVs were filtered for those with very high quality (coverage  $\geq 10$ ,  $\geq 5$  reads supporting the variant, SNV quality  $\geq 30$ , SNV consensus  $\geq 30$ ). We defined a "window" as 10 SNPs within a 1,000 Kb window. One heterozygous SNV was allowed in a window. A homozygous segment was then defined as a region with 10 SNVs in a 1 Kb window.

This analysis identified 1,532 homozygous regions ( $\geq 1$  Kb) in total, with approximately 500 in each case genome. The two siblings from family B had 341 regions that overlapped by at least 500 base pairs. These regions were then compared to the homozygous regions identified in the third unrelated patient from family A. There were 169 homozygous regions that overlapped by at least 500 bp and they were found in all three case genomes.

The exome data were re-examined by focusing only on regions of homozygosity. This analysis revealed that the case genomes contained only 20 rare and plausibly functional sequence variants (predicted homozygote frequency of  $\leq 3\%$  in our sequenced control genomes) in these homozygous regions. The majority of these 20 variants were found in only one of the three case genomes. There was only one plausibly functional variant (non-synonymous) present in two of the three case genomes, however this variant was very common (control MAF of 0.13). Importantly, only the *ASNS* variant was present in all three case genomes from families A and B.

Homozygosity mapping was also done in family C at the McGill University Genome Quebec Innovation Center (Montreal, Canada). Briefly, genomic DNA (~2.5 $\mu$ g) from the blood of the two affected siblings (C:II.3 and II.4) was used to perform whole-genome genotyping using the Illumina 660 Quad Chip (Infinium HD). PLINK (v.1.06) (Purcell et al., 2007) was used to identify shared regions of homozygosity with a size of >1Mb.

### ***ASNS* in population controls**

We looked in the CHGV dataset of 4,845 high-density genome-wide SNP genotyped controls and found no copy number variations (CNVs), as predicted by PennCNV, which overlapped the *ASNS* gene (data not shown). Additionally, only one CNV in this region is reported in the Database of Genomic Variants (<http://projects.tcag.ca/variation/>). The involvement of *ASNS* in this phenotype would have been refuted, if homozygous deletions encompassing this gene had been observed in this CNV data. Also, *ASNS* has a halopinsufficiency score of 0.551 (Huang et al., 2010).

### ***ASNS* conservation and mutation locations in the folded ortholog**

An examination of the *E. coli* ortholog structure (pubmid:10587437) reveals that the inferred p.A6E position is located in the N-terminal domain (which is responsible for glutamine hydrolysis), that faces a pocket identified as the glutamine binding site (pubmid:10587437, Fig. 3b). The inferred p.F362V position is located on the C-terminal domain, near the AMP binding site (Fig. 3b). The inferred p.R550C position is located at the distal end of the C-terminus which is disordered in the *E. coli* ortholog and thus the crystallographic structure is not available. However, this region is in the interface between the N-terminal and C-terminal domains and it might play a role in binding the aspartate substrate (pubmid:10587437). Additionally, the predicted deleterious effect of these mutations on the protein functionality (Table 2) supports the putative destabilization observed in our heterologous expression experiment, as well as the functionally important disposition of the mutated residues in the homologous 3D structure.

## SUPPLEMENTAL INFORMATION

*Deficiency of asparagine synthetase causes congenital microcephaly and a progressive form of encephalopathy.*

### **Mouse behavioral testing**

#### **Mouse behavioral testing: overview**

No genotype differences were discerned for spontaneous locomotor activity in the open field (Figure S5A (i)) or in the overall time spent in movement (Figure S5B (i)). Similarly, no genotype distinctions were seen for anxiety-like behavior in the open field (Figure S5B (ii)) or in the light-dark emergence test (Figure S5B (iii-iv)). In the accelerating rotorod test, *Asns*<sup>+/-</sup> and *Asns*<sup>-/-</sup> mice stayed on the rotorod longer than CONT mice over the first three trials of testing (Figure S5A (ii)). However, CONT mice showed motor learning across trials, whereas a ceiling effect probably precluded seeing this change in performance in the mutant mice. Episodic memory was examined in the novel object recognition test where short- (STM) and long-term memory (LTM) were evaluated (Rampon et al., 2000). In the STM test, *Asns*<sup>+/-</sup> and *Asns*<sup>-/-</sup> mice showed no preference for either the novel or familiar object. In the test for LTM, the *Asns*<sup>-/-</sup> mice failed to demonstrate a preference for either object. By comparison, CONT and *Asns*<sup>+/-</sup> animals preferred the novel object; however, LTM was still reduced in the *Asns*<sup>-/-</sup> mice (Figure S5A (iii)). It should be emphasized that the deficits in STM or LTM by the mutants was not related to the total time spent with the objects or to the total numbers of object contacts (Figure S5B (v-vi)). Collectively, these data indicate that *Asns*<sup>-/-</sup> mice are impaired in both STM and LTM. By contrast, there is some sparing of LTM in the *Asns*<sup>+/-</sup> animals, suggesting that memory consolidation is delayed in these mutants.

#### **Mouse behavioral testing: methods**

Adult male and female B6NTac (Taconic Labs, Hudson, NY) served as controls and were tested with the heterozygous and homozygous mutant mice (B6NTac;B6N-*Asns*<sup>tm1a(EUCOMM)Wtsi</sup>/H; European Mutant Mouse Archive, Munich, Germany). Adult CONT, *Asns*<sup>+/-</sup>, and *Asns*<sup>-/-</sup> mice were housed under controlled temperature and humidity conditions under a 14:10 h light:dark cycle (light onset 0800 h) with food and water provided *ad libitum*. All behavioral assessments were conducted during the light cycle between 1000 and 1700 h. Mice were tested in following order with 3-5 days interposed between tests: light-dark emergence, open field, rotorod, and novel object recognition as described (Carlson et al., 2011). All procedures were approved by the Duke University Institutional Animal Care and Use Committee and were conducted accordance with NIH guidelines for the care and use of laboratory animals.

All behavioral data are presented as means and SEM and were analyzed with SPSS 20 (IBM North America, New York, New York) using ANOVA (open field, light-dark emergence test), repeated measures ANOVA (RMANOVA; rotorod, novel object recognition test), and the Kruskal-Wallis test for rank-ordered data (percent increases in performance during rotorod testing). Bonferroni corrected pair-wise comparisons were used for *aposteriori* comparisons where a  $p < 0.05$  was considered significant.

The mice were tested in the light-dark emergence test for 5 min and were monitored with Med-PC IV software (Med-Associates, St. Albans, VT); the open field data were collected over 30 min with Versamax software (Accuscan Instruments, Columbus, OH); the accelerating rotorod data were collected over 5 min with Med-Associates rotorod software; and the novel object recognition testing was conducted in Plexiglas arenas with mouse-friendly objects over 10 min and analyzed with TopScan software (Clever Sys Inc., Reston, VA). Preference scores in the novel object recognition test were calculated by subtracting the total time spent with the novel object from the total time spent with the familiar object during each test, and divided by the total time spent with both objects. Positive scores indicated a preference for the novel object, negative scores a preference for the familiar object, and scores approaching zero indicated no preference for either object.

#### **Mouse behavioral testing: additional results**

In the open field an ANOVA revealed no significant genotype differences for spontaneous distance traveled (Figure S5A (i)), time spent in overall movement (Figure S5B (i)), or distance moved in the center of the open field (Figure S5B (ii)).

In the rotorod test, a RMANOVA for latency to fall for the within subjects test found the main effect of test-trial to be significant [ $F_{(3,66)}=7.832$ ,  $p < 0.001$ ] and the between subjects test revealed a significant genotype effect [ $F_{(2,22)}=5.174$ ,  $p < 0.014$ ]. Although the genotype by test-trial interaction was not significant, inspection of the Figure S5A (ii) indicated that the genotypes were differentially responding to the task. When data were expressed as the percent change in latency to fall from the first to last trials; CONT mice showed a 183% increase in motor learning over testing, whereas a small enhancement 25% was observed in the *Asns*<sup>+/-</sup> animals and *Asns*<sup>-/-</sup> mice had an increase of 51%. A Kruskal-Wallis test for rank-ordered data found a significant difference between the three genotypes [ $H_{(2,22)}=6.281$ ,  $p < 0.043$ ]; confirming that performance of the CONT animals was superior to that of the *Asns*<sup>+/-</sup> and *Asns*<sup>-/-</sup> mice.

## SUPPLEMENTAL INFORMATION

*Deficiency of asparagine synthetase causes congenital microcephaly and a progressive form of encephalopathy.*

In the light-dark emergence test, ANOVA for the latency to emerge from the darkened chamber into the lighted chamber (Figure S5B (iii)) and the time spent in the lighted chamber (Figure S5B (iv)) were not significantly different among genotypes.

In the novel object recognition test, a RMANOVA reported a significant effect of test-session [ $F_{(2,44)}=11.209$ ,  $p<0.001$ ] and a significant test-session by genotype interaction [ $F_{(4,44)}=6.178$ ,  $p<0.043$ ]. Bonferroni corrected pairwise comparisons for the STM test revealed that  $Asns^{+/-}$  and  $Asns^{-/-}$  mice had significant lower preference scores for the novel object than CONT animals ( $ps<0.039$ ); preference scores between the mutants did not differ (Figure S5A (iii)). In the test for LTM, preference scores were increased for the  $Asns^{+/-}$  mice relative to their performance in the STM test. However, their scores were still significantly lower ( $p<0.046$ ) than those for CONT animals. By comparison,  $Asns^{-/-}$  mice continued to show no object preference and their scores were significantly lower than those for the  $Asns^{+/-}$  and CONT animals ( $ps<0.001$ ). Despite differences in the preference scores, the genotypes of mice did not differ according to time spent exploring the objects (Figure S5B (v)) or total contacts with the objects (Figure S5B (vi)). These data indicate that memory function is severely impaired in the  $Asns^{-/-}$  mice and is less deficient in the  $Asns^{+/-}$  animals.

## SUPPLEMENTAL INFORMATION

*Deficiency of asparagine synthetase causes congenital microcephaly and a progressive form of encephalopathy.*

### SUPPLEMENTAL REFERENCES

Bilguvar, K., Öztürk, A.K., Louvi, A., Kwan, K.Y., Choi, M., Tatli, B., Yalnizoğlu, D., Tuysuz, B., Çağlayan, A.O., Gökben, S., et al. (2010). Whole-exome sequencing identifies recessive WDR62 mutations in severe brain malformations. *Nature* *467*, 207–210.

Carlson, B.R., Lloyd, K.E., Kruszewski, A., Kim, I.-H., Rodriguiz, R.M., Heindel, C., Faytell, M., Dudek, S.M., Wetsel, W.C., and Soderling, S.H. (2011). WRP/srGAP3 facilitates the initiation of spine development by an inverse F-BAR domain, and its loss impairs long-term memory. *The Journal of Neuroscience : the Official Journal of the Society for Neuroscience* *31*, 2447–2460.

Cox, J., Jackson, A.P., Bond, J., and Woods, C.G. (2006). What primary microcephaly can tell us about brain growth. *Trends Mol Med* *12*, 358–366.

Guernsey, D.L., Jiang, H., Hussin, J., Arnold, M., Bouyakdan, K., Perry, S., Babineau-Sturk, T., Beis, J., Dumas, N., Evans, S.C., et al. (2010). Mutations in Centrosomal Protein CEP152 in Primary Microcephaly Families Linked to MCPH4. *The American Journal of Human Genetics* *87*, 40–51.

Hart, C.E., Race, V., Achouri, Y., Wiame, E., Sharrard, M., Olpin, S.E., Watkinson, J., Bonham, J.R., Jaeken, J., Matthijs, G., et al. (2007). Phosphoserine aminotransferase deficiency: a novel disorder of the serine biosynthesis pathway. *The American Journal of Human Genetics* *80*, 931–937.

Horowitz, B., Madras, B.K., Meister, A., Old, L.J., Boyes, E.A., and Stockert, E. (1968). Asparagine synthetase activity of mouse leukemias. *Science* *160*, 533–535.

Huang, N., Lee, I., Marcotte, E., Hurles, M., and Schierup, M. (2010). Characterising and Predicting Haploinsufficiency in the Human Genome. *PLoS Genet*.

Hubbard, T.J.P., Aken, B.L., Ayling, S., Ballester, B., Beal, K., Bragin, E., Brent, S., Chen, Y., Clapham, P., Clarke, L., et al. (2009). Ensembl 2009. *Nucleic Acids Res* *37*, D690–D697.

Kaindl, A.M., Passemard, S., Kumar, P., Kraemer, N., Issa, L., Zwirner, A., Gerard, B., Verloes, A., Mani, S., and Gressens, P. (2010). Many roads lead to primary autosomal recessive microcephaly. *Progress in Neurobiology* *90*, 363–383.

Kelley, R.I., Robinson, D., Puffenberger, E.G., Strauss, K.A., and Morton, D.H. (2002). Amish lethal microcephaly: A new metabolic disorder with severe congenital microcephaly and 2-ketoglutaric aciduria. *Am J Med Genet* *112*, 318–326.

Langmead, B., Trapnell, C., Pop, M., and Salzberg, S.L. (2009). Ultrafast and memory-efficient alignment of short DNA sequences to the human genome. *Genome Biol* *10*, R25.

Nicholas, A.K., Khurshid, M., Désir, J., Carvalho, O.P., Cox, J.J., Thornton, G., Kausar, R., Ansar, M., Ahmad, W., Verloes, A., et al. (2010). WDR62 is associated with the spindle pole and is mutated in human microcephaly. *Nature Publishing Group* *42*, 1010–1014.

Purcell, S., Neale, B., Todd-Brown, K., Thomas, L., Ferreira, M.A.R., Bender, D., Maller, J., Sklar, P., de Bakker, P.I.W., Daly, M.J., et al. (2007). PLINK: a tool set for whole-genome association and population-based linkage analyses. *Am J Hum Genet* *81*, 559–575.

Quinlan, A.R., and Hall, I.M. (2010). BEDTools: a flexible suite of utilities for comparing genomic features. *Bioinformatics* *26*, 841–842.

Rampon, C., Tang, Y.P., Goodhouse, J., Shimizu, E., Kyin, M., and Tsien, J.Z. (2000). Enrichment induces structural changes and recovery from nonspatial memory deficits in CA1 NMDAR1-knockout mice. *Nature Publishing Group* *3*, 238–244.

Siu, V.M., Ratko, S., Prasad, A.N., Prasad, C., and Rupar, C.A. (2010). Amish microcephaly: Long-term survival and biochemical characterization. *Am J Med Genet* *152A*, 1747–1751.
